# Supplementary material
Source: PubMed Central journal article supplement (PMC2585777)
Supplement: NIHMS61235-supplement-si20060517_120.pdf [file NIHMS61235-supplement-si20060517_120.pdf]

Supporting Information for

Diphenylamido Precursors to Bisalkoxide Molybdenum Olefin Metathesis Catalysts

by

Amritanshu Sinha, Richard R. Schrock,\* Peter Müller, and Amir H. Hoveyda

For  $\text{Mo}(\text{NAr})(\text{CHCMe}_2\text{Ph})(\text{NPh}_2)_2$

1. Crystallographic Experimental
2. Fully labeled thermal ellipsoid drawing
3. Crystal data and structure refinement
  4. Atomic coordinates
  5. Bond lengths and angles
  6. Anisotropic displacement parameters
  7. Hydrogen coordinates

## Crystallographic Details

Low temperature diffraction data were collected on a Siemens Platform three-circle diffractometer coupled to a Bruker-AXS Smart Apex CCD detector with graphite-monochromated MoK $\alpha$  radiation ( $\lambda = 0.71073 \text{ \AA}$ ), performing  $\phi$ - and  $\omega$ -scans. The structure was solved by direct methods using SHELXS<sup>1</sup> and refined against  $F^2$  on all data by full-matrix least squares with SHELXL-97<sup>2</sup>. All non-hydrogen atoms were refined anisotropically. All hydrogen atoms were included into the model at geometrically calculated positions and refined using a riding model. The isotropic displacement parameters of all hydrogen atoms were fixed to 1.2 times the U value of the atoms they are linked to (1.5 times for methyl groups). Crystal and structural refinement data are listed in Table 1.

The crystal was non-merohedrally twinned. Two independent orientation matrices for the unit cell were found using the program CELL\_NOW<sup>3</sup>, and data reduction taking into account the twinning was performed with SAINT<sup>4</sup>. The program TWINABS<sup>5</sup> was used to perform absorption correction and to set up the HKLF5 format file for structure refinement. The twin ratio was refined freely and converged at a value of 0.256(9).

1. Sheldrick, G. M. *Acta Cryst.* **1990**, *A46*, 467.
2. Sheldrick, G. M (1997). SHELXL 97, University of Göttingen, Germany.
3. Sheldrick, G. M (2003). CELL\_NOW, University of Göttingen, Germany.
4. Bruker (2005). SAINT, Bruker-AXS Inc., Madison, Wisconsin, USA.
5. Sheldrick, G. M (2002). TWINABS, University of Göttingen, Germany.

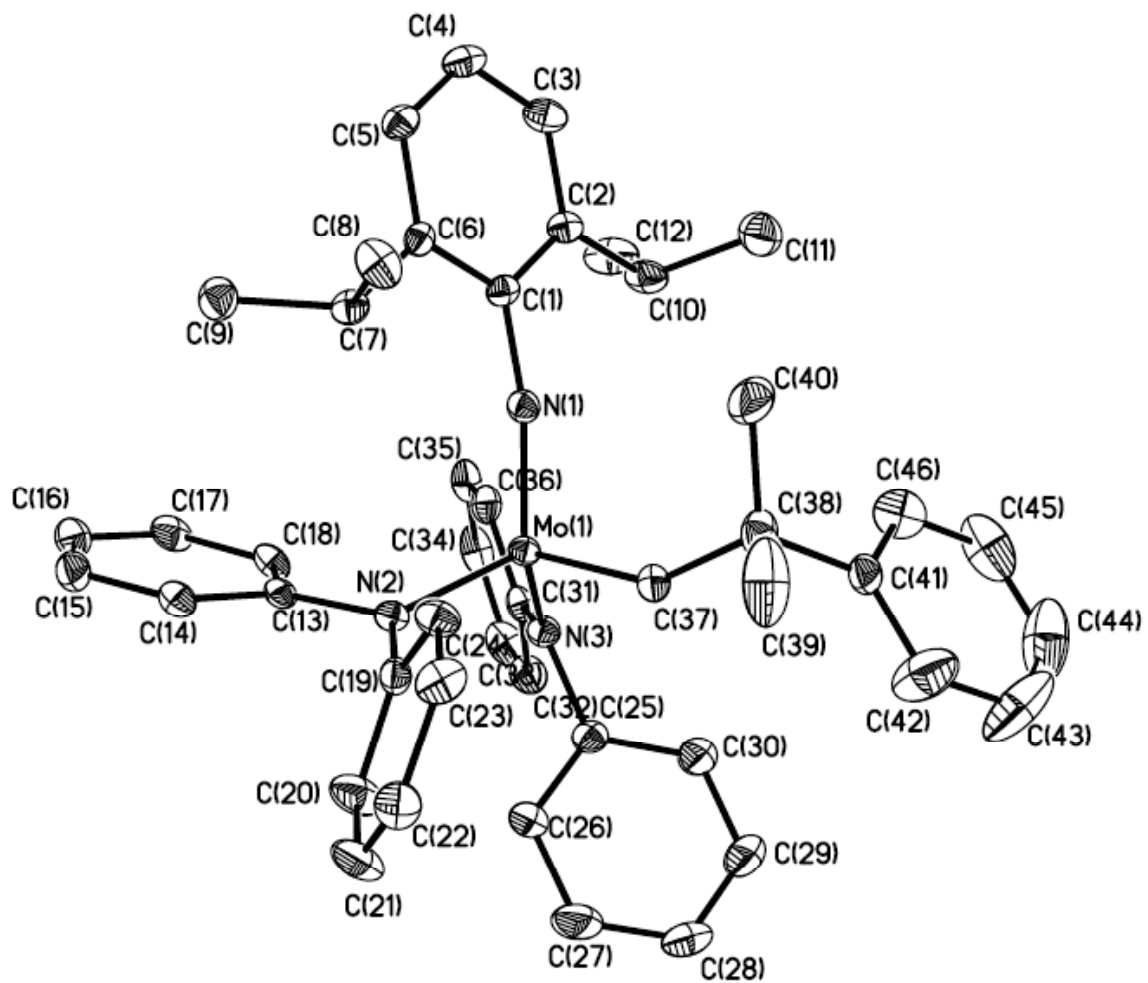

**Table 1.** Crystal data and structure refinement for Mo(NAr)(CHCMe<sub>2</sub>Ph)(NPh<sub>2</sub>)<sub>2</sub>.

|                                   |                                                   |                            |
|-----------------------------------|---------------------------------------------------|----------------------------|
| Empirical formula                 | C <sub>46</sub> H <sub>49</sub> N <sub>3</sub> Mo |                            |
| Formula weight                    | 739.82                                            |                            |
| Temperature                       | 100(2) K                                          |                            |
| Wavelength                        | 0.71073 Å                                         |                            |
| Crystal system                    | Triclinic                                         |                            |
| Space group                       | P $\bar{1}$                                       |                            |
| Unit cell dimensions              | a = 9.279(3) Å                                    | $\alpha = 79.848(6)^\circ$ |
|                                   | b = 20.158(7) Å                                   | $\beta = 89.997(6)^\circ$  |
|                                   | c = 20.739(8) Å                                   | $\gamma = 83.507(6)^\circ$ |
| Volume                            | 3793(2) Å <sup>3</sup>                            |                            |
| Z                                 | 4                                                 |                            |
| Density (calculated)              | 1.296 Mg/m <sup>3</sup>                           |                            |
| Absorption coefficient            | 0.382 mm <sup>-1</sup>                            |                            |
| F(000)                            | 1552                                              |                            |
| Crystal size                      | 0.20 x 0.15 x 0.05 mm <sup>3</sup>                |                            |
| Theta range for data collection   | 1.00 to 28.49°                                    |                            |
| Index ranges                      | -12 ≤ h ≤ 12, -26 ≤ k ≤ 27, 0 ≤ l ≤ 27            |                            |
| Reflections collected             | 23612                                             |                            |
| Independent reflections           | 23612 [non-merohedral twin]                       |                            |
| Completeness to theta = 28.49°    | 97.2 %                                            |                            |
| Absorption correction             | Semi-empirical from equivalents                   |                            |
| Max. and min. transmission        | 0.9812 and 0.9276                                 |                            |
| Refinement method                 | Full-matrix least-squares on F <sup>2</sup>       |                            |
| Data / restraints / parameters    | 23612 / 0 / 914                                   |                            |
| Goodness-of-fit on F <sup>2</sup> | 1.020                                             |                            |
| Final R indices [I > 2σ(I)]       | R1 = 0.0486, wR2 = 0.1032                         |                            |
| R indices (all data)              | R1 = 0.0726, wR2 = 0.1119                         |                            |
| Largest diff. peak and hole       | 0.946 and -0.517 e. Å <sup>-3</sup>               |                            |

**Table 2.** Atomic coordinates ( $\times 10^4$ ) and equivalent isotropic displacement parameters ( $\text{\AA}^2 \times 10^3$ ) for  $\text{Mo}(\text{NAr})(\text{CHCMe}_2\text{Ph})(\text{NPh}_2)_2$ .  $U(\text{eq})$  is defined as one third of the trace of the orthogonalized  $U^{ij}$  tensor.

|       | x        | y       | z        | $U(\text{eq})$ |
|-------|----------|---------|----------|----------------|
| Mo(1) | 6199(1)  | 7517(1) | 1290(1)  | 13(1)          |
| N(1)  | 7363(3)  | 6793(1) | 1601(1)  | 16(1)          |
| N(2)  | 4913(3)  | 7409(1) | 545(1)   | 15(1)          |
| N(3)  | 5034(3)  | 7959(1) | 1948(1)  | 16(1)          |
| C(1)  | 8162(3)  | 6150(2) | 1769(2)  | 14(1)          |
| C(2)  | 8995(3)  | 6000(2) | 2358(2)  | 16(1)          |
| C(3)  | 9790(4)  | 5365(2) | 2511(2)  | 22(1)          |
| C(4)  | 9758(4)  | 4879(2) | 2110(2)  | 22(1)          |
| C(5)  | 8933(3)  | 5034(2) | 1538(2)  | 18(1)          |
| C(6)  | 8146(3)  | 5670(2) | 1344(2)  | 15(1)          |
| C(7)  | 7338(4)  | 5832(2) | 689(2)   | 17(1)          |
| C(8)  | 8419(4)  | 5833(2) | 123(2)   | 25(1)          |
| C(9)  | 6213(4)  | 5337(2) | 642(2)   | 24(1)          |
| C(10) | 9024(4)  | 6491(2) | 2835(2)  | 23(1)          |
| C(11) | 10534(4) | 6700(2) | 2919(2)  | 35(1)          |
| C(12) | 8462(4)  | 6176(2) | 3505(2)  | 32(1)          |
| C(13) | 3948(3)  | 6901(2) | 655(2)   | 15(1)          |
| C(14) | 3386(3)  | 6619(2) | 152(2)   | 18(1)          |
| C(15) | 2491(4)  | 6106(2) | 295(2)   | 23(1)          |
| C(16) | 2149(4)  | 5855(2) | 932(2)   | 24(1)          |
| C(17) | 2692(3)  | 6130(2) | 1431(2)  | 22(1)          |
| C(18) | 3560(3)  | 6654(2) | 1299(2)  | 19(1)          |
| C(19) | 5004(3)  | 7738(2) | -123(2)  | 16(1)          |
| C(20) | 3815(4)  | 8164(2) | -432(2)  | 29(1)          |
| C(21) | 3897(4)  | 8472(2) | -1077(2) | 30(1)          |
| C(22) | 5129(4)  | 8362(2) | -1429(2) | 24(1)          |
| C(23) | 6316(4)  | 7953(2) | -1124(2) | 23(1)          |
| C(24) | 6250(4)  | 7639(2) | -474(2)  | 20(1)          |
| C(25) | 4657(4)  | 8665(2) | 1697(2)  | 19(1)          |
| C(26) | 3635(4)  | 8864(2) | 1193(2)  | 29(1)          |

|       |          |          |         |       |
|-------|----------|----------|---------|-------|
| C(27) | 3369(5)  | 9541(2)  | 899(2)  | 48(1) |
| C(28) | 4096(5)  | 10025(2) | 1117(2) | 49(1) |
| C(29) | 5068(5)  | 9832(2)  | 1634(2) | 42(1) |
| C(30) | 5361(4)  | 9160(2)  | 1922(2) | 31(1) |
| C(31) | 4548(3)  | 7702(2)  | 2575(2) | 17(1) |
| C(32) | 3586(4)  | 8095(2)  | 2917(2) | 25(1) |
| C(33) | 3134(4)  | 7829(2)  | 3531(2) | 30(1) |
| C(34) | 3604(4)  | 7173(2)  | 3828(2) | 29(1) |
| C(35) | 4540(4)  | 6776(2)  | 3493(2) | 24(1) |
| C(36) | 5002(4)  | 7033(2)  | 2873(2) | 20(1) |
| C(37) | 7444(3)  | 8139(2)  | 903(2)  | 19(1) |
| C(38) | 9001(4)  | 8267(2)  | 760(2)  | 25(1) |
| C(39) | 9133(5)  | 8523(2)  | 14(2)   | 49(1) |
| C(40) | 10017(4) | 7614(2)  | 944(2)  | 45(1) |
| C(41) | 9353(4)  | 8817(2)  | 1153(2) | 22(1) |
| C(42) | 9157(5)  | 9496(2)  | 885(2)  | 49(1) |
| C(43) | 9493(7)  | 9982(2)  | 1261(3) | 70(2) |
| C(44) | 9992(6)  | 9791(3)  | 1885(3) | 60(2) |
| C(45) | 10167(5) | 9131(3)  | 2150(2) | 45(1) |
| C(46) | 9842(4)  | 8647(2)  | 1793(2) | 33(1) |
| Mo(2) | 2437(1)  | 2462(1)  | 3716(1) | 13(1) |
| N(4)  | 3243(3)  | 3190(1)  | 3403(1) | 14(1) |
| N(5)  | 1571(3)  | 1984(1)  | 3062(1) | 17(1) |
| N(6)  | 1076(3)  | 2577(1)  | 4455(1) | 16(1) |
| C(47) | 3750(3)  | 3824(2)  | 3222(2) | 14(1) |
| C(48) | 4502(3)  | 3967(2)  | 2626(2) | 18(1) |
| C(49) | 4991(4)  | 4606(2)  | 2465(2) | 20(1) |
| C(50) | 4719(4)  | 5093(2)  | 2853(2) | 20(1) |
| C(51) | 3969(4)  | 4948(2)  | 3429(2) | 20(1) |
| C(52) | 3493(3)  | 4316(2)  | 3629(2) | 15(1) |
| C(53) | 2758(3)  | 4172(2)  | 4287(2) | 15(1) |
| C(54) | 1400(3)  | 4663(2)  | 4330(2) | 22(1) |
| C(55) | 3830(4)  | 4180(2)  | 4846(2) | 23(1) |
| C(56) | 4771(4)  | 3464(2)  | 2164(2) | 22(1) |
| C(57) | 4069(4)  | 3766(2)  | 1493(2) | 31(1) |
| C(58) | 6389(4)  | 3254(2)  | 2092(2) | 33(1) |

|       |          |         |         |       |
|-------|----------|---------|---------|-------|
| C(59) | 946(3)   | 2233(2) | 2436(2) | 17(1) |
| C(60) | 1012(3)  | 2912(2) | 2142(2) | 17(1) |
| C(61) | 406(3)   | 3161(2) | 1524(2) | 22(1) |
| C(62) | -286(4)  | 2750(2) | 1183(2) | 25(1) |
| C(63) | -369(4)  | 2086(2) | 1474(2) | 27(1) |
| C(64) | 223(4)   | 1824(2) | 2090(2) | 23(1) |
| C(65) | 1592(4)  | 1268(2) | 3303(2) | 23(1) |
| C(66) | 601(4)   | 1040(2) | 3763(2) | 36(1) |
| C(67) | 687(6)   | 351(2)  | 4022(2) | 61(2) |
| C(68) | 1756(7)  | -95(2)  | 3838(3) | 69(2) |
| C(69) | 2716(6)  | 129(2)  | 3381(3) | 65(2) |
| C(70) | 2648(5)  | 808(2)  | 3114(2) | 40(1) |
| C(71) | 1344(3)  | 2262(2) | 5125(2) | 16(1) |
| C(72) | 2507(3)  | 2405(2) | 5480(2) | 20(1) |
| C(73) | 2736(4)  | 2113(2) | 6130(2) | 21(1) |
| C(74) | 1817(4)  | 1672(2) | 6439(2) | 23(1) |
| C(75) | 673(4)   | 1513(2) | 6083(2) | 28(1) |
| C(76) | 430(4)   | 1806(2) | 5435(2) | 23(1) |
| C(77) | -120(3)  | 3083(2) | 4335(2) | 16(1) |
| C(78) | -626(3)  | 3322(2) | 3689(2) | 19(1) |
| C(79) | -1729(4) | 3846(2) | 3547(2) | 23(1) |
| C(80) | -2391(4) | 4139(2) | 4047(2) | 23(1) |
| C(81) | -1930(4) | 3899(2) | 4684(2) | 21(1) |
| C(82) | -798(3)  | 3379(2) | 4833(2) | 18(1) |
| C(83) | 3974(3)  | 1862(2) | 4136(1) | 15(1) |
| C(84) | 5590(3)  | 1746(2) | 4290(2) | 22(1) |
| C(85) | 6283(4)  | 2413(2) | 4086(2) | 31(1) |
| C(86) | 5825(4)  | 1515(2) | 5036(2) | 34(1) |
| C(87) | 6198(3)  | 1190(2) | 3912(2) | 22(1) |
| C(88) | 6320(4)  | 505(2)  | 4198(2) | 39(1) |
| C(89) | 6817(5)  | 1(2)    | 3850(2) | 43(1) |
| C(90) | 7214(4)  | 169(2)  | 3206(2) | 35(1) |
| C(91) | 7115(4)  | 840(2)  | 2920(2) | 34(1) |
| C(92) | 6595(4)  | 1344(2) | 3267(2) | 30(1) |

---

**Table 3.** Bond lengths [ $\text{\AA}$ ] and angles [ $^\circ$ ] for  $\text{Mo}(\text{NAr})(\text{CHCMe}_2\text{Ph})(\text{NPh}_2)_2$ .

|              |          |              |          |
|--------------|----------|--------------|----------|
| Mo(1)-N(1)   | 1.739(3) | C(11)-H(11C) | 0.9800   |
| Mo(1)-C(37)  | 1.877(3) | C(12)-H(12A) | 0.9800   |
| Mo(1)-N(3)   | 2.007(3) | C(12)-H(12B) | 0.9800   |
| Mo(1)-N(2)   | 2.009(3) | C(12)-H(12C) | 0.9800   |
| N(1)-C(1)    | 1.406(4) | C(13)-C(14)  | 1.400(4) |
| N(2)-C(13)   | 1.424(4) | C(13)-C(18)  | 1.403(4) |
| N(2)-C(19)   | 1.433(4) | C(14)-C(15)  | 1.390(4) |
| N(3)-C(31)   | 1.407(4) | C(14)-H(14)  | 0.9500   |
| N(3)-C(25)   | 1.431(4) | C(15)-C(16)  | 1.381(5) |
| C(1)-C(2)    | 1.414(4) | C(15)-H(15)  | 0.9500   |
| C(1)-C(6)    | 1.419(4) | C(16)-C(17)  | 1.377(5) |
| C(2)-C(3)    | 1.388(4) | C(16)-H(16)  | 0.9500   |
| C(2)-C(10)   | 1.521(4) | C(17)-C(18)  | 1.388(4) |
| C(3)-C(4)    | 1.395(4) | C(17)-H(17)  | 0.9500   |
| C(3)-H(3)    | 0.9500   | C(18)-H(18)  | 0.9500   |
| C(4)-C(5)    | 1.380(5) | C(19)-C(24)  | 1.381(4) |
| C(4)-H(4)    | 0.9500   | C(19)-C(20)  | 1.399(4) |
| C(5)-C(6)    | 1.394(4) | C(20)-C(21)  | 1.377(5) |
| C(5)-H(5)    | 0.9500   | C(20)-H(20)  | 0.9500   |
| C(6)-C(7)    | 1.517(4) | C(21)-C(22)  | 1.375(5) |
| C(7)-C(9)    | 1.538(4) | C(21)-H(21)  | 0.9500   |
| C(7)-C(8)    | 1.544(4) | C(22)-C(23)  | 1.380(5) |
| C(7)-H(7)    | 1.0000   | C(22)-H(22)  | 0.9500   |
| C(8)-H(8A)   | 0.9800   | C(23)-C(24)  | 1.389(4) |
| C(8)-H(8B)   | 0.9800   | C(23)-H(23)  | 0.9500   |
| C(8)-H(8C)   | 0.9800   | C(24)-H(24)  | 0.9500   |
| C(9)-H(9A)   | 0.9800   | C(25)-C(26)  | 1.384(5) |
| C(9)-H(9B)   | 0.9800   | C(25)-C(30)  | 1.397(5) |
| C(9)-H(9C)   | 0.9800   | C(26)-C(27)  | 1.388(5) |
| C(10)-C(11)  | 1.526(5) | C(26)-H(26)  | 0.9500   |
| C(10)-C(12)  | 1.539(5) | C(27)-C(28)  | 1.383(6) |
| C(10)-H(10)  | 1.0000   | C(27)-H(27)  | 0.9500   |
| C(11)-H(11A) | 0.9800   | C(28)-C(29)  | 1.373(6) |
| C(11)-H(11B) | 0.9800   | C(28)-H(28)  | 0.9500   |



|              |          |              |          |
|--------------|----------|--------------|----------|
| C(29)-C(30)  | 1.379(5) | Mo(2)-N(4)   | 1.745(2) |
| C(29)-H(29)  | 0.9500   | Mo(2)-C(83)  | 1.870(3) |
| C(30)-H(30)  | 0.9500   | Mo(2)-N(6)   | 2.013(2) |
| C(31)-C(36)  | 1.399(4) | Mo(2)-N(5)   | 2.014(3) |
| C(31)-C(32)  | 1.402(4) | N(4)-C(47)   | 1.401(4) |
| C(32)-C(33)  | 1.377(5) | N(5)-C(59)   | 1.407(4) |
| C(32)-H(32)  | 0.9500   | N(5)-C(65)   | 1.440(4) |
| C(33)-C(34)  | 1.380(5) | N(6)-C(77)   | 1.410(4) |
| C(33)-H(33)  | 0.9500   | N(6)-C(71)   | 1.432(4) |
| C(34)-C(35)  | 1.384(5) | C(47)-C(52)  | 1.413(4) |
| C(34)-H(34)  | 0.9500   | C(47)-C(48)  | 1.421(4) |
| C(35)-C(36)  | 1.386(4) | C(48)-C(49)  | 1.398(4) |
| C(35)-H(35)  | 0.9500   | C(48)-C(56)  | 1.514(4) |
| C(36)-H(36)  | 0.9500   | C(49)-C(50)  | 1.378(4) |
| C(37)-C(38)  | 1.516(4) | C(49)-H(49)  | 0.9500   |
| C(37)-H(37)  | 0.9500   | C(50)-C(51)  | 1.385(4) |
| C(38)-C(40)  | 1.520(5) | C(50)-H(50)  | 0.9500   |
| C(38)-C(41)  | 1.548(5) | C(51)-C(52)  | 1.389(4) |
| C(38)-C(39)  | 1.552(5) | C(51)-H(51)  | 0.9500   |
| C(39)-H(39A) | 0.9800   | C(52)-C(53)  | 1.522(4) |
| C(39)-H(39B) | 0.9800   | C(53)-C(54)  | 1.525(4) |
| C(39)-H(39C) | 0.9800   | C(53)-C(55)  | 1.532(4) |
| C(40)-H(40A) | 0.9800   | C(53)-H(53)  | 1.0000   |
| C(40)-H(40B) | 0.9800   | C(54)-H(54A) | 0.9800   |
| C(40)-H(40C) | 0.9800   | C(54)-H(54B) | 0.9800   |
| C(41)-C(46)  | 1.376(5) | C(54)-H(54C) | 0.9800   |
| C(41)-C(42)  | 1.376(5) | C(55)-H(55A) | 0.9800   |
| C(42)-C(43)  | 1.416(6) | C(55)-H(55B) | 0.9800   |
| C(42)-H(42)  | 0.9500   | C(55)-H(55C) | 0.9800   |
| C(43)-C(44)  | 1.350(7) | C(56)-C(58)  | 1.528(5) |
| C(43)-H(43)  | 0.9500   | C(56)-C(57)  | 1.531(5) |
| C(44)-C(45)  | 1.340(7) | C(56)-H(56)  | 1.0000   |
| C(44)-H(44)  | 0.9500   | C(57)-H(57A) | 0.9800   |
| C(45)-C(46)  | 1.382(6) | C(57)-H(57B) | 0.9800   |
| C(45)-H(45)  | 0.9500   | C(57)-H(57C) | 0.9800   |
| C(46)-H(46)  | 0.9500   | C(58)-H(58A) | 0.9800   |

|              |          |                  |            |
|--------------|----------|------------------|------------|
| C(58)-H(58B) | 0.9800   | C(77)-C(78)      | 1.403(4)   |
| C(58)-H(58C) | 0.9800   | C(78)-C(79)      | 1.377(4)   |
| C(59)-C(60)  | 1.405(4) | C(78)-H(78)      | 0.9500     |
| C(59)-C(64)  | 1.406(4) | C(79)-C(80)      | 1.391(5)   |
| C(60)-C(61)  | 1.386(4) | C(79)-H(79)      | 0.9500     |
| C(60)-H(60)  | 0.9500   | C(80)-C(81)      | 1.376(5)   |
| C(61)-C(62)  | 1.387(5) | C(80)-H(80)      | 0.9500     |
| C(61)-H(61)  | 0.9500   | C(81)-C(82)      | 1.391(4)   |
| C(62)-C(63)  | 1.380(5) | C(81)-H(81)      | 0.9500     |
| C(62)-H(62)  | 0.9500   | C(82)-H(82)      | 0.9500     |
| C(63)-C(64)  | 1.383(5) | C(83)-C(84)      | 1.516(4)   |
| C(63)-H(63)  | 0.9500   | C(83)-H(83)      | 0.9500     |
| C(64)-H(64)  | 0.9500   | C(84)-C(87)      | 1.535(5)   |
| C(65)-C(70)  | 1.377(5) | C(84)-C(86)      | 1.543(5)   |
| C(65)-C(66)  | 1.381(5) | C(84)-C(85)      | 1.548(5)   |
| C(66)-C(67)  | 1.391(6) | C(85)-H(85A)     | 0.9800     |
| C(66)-H(66)  | 0.9500   | C(85)-H(85B)     | 0.9800     |
| C(67)-C(68)  | 1.362(8) | C(85)-H(85C)     | 0.9800     |
| C(67)-H(67)  | 0.9500   | C(86)-H(86A)     | 0.9800     |
| C(68)-C(69)  | 1.354(8) | C(86)-H(86B)     | 0.9800     |
| C(68)-H(68)  | 0.9500   | C(86)-H(86C)     | 0.9800     |
| C(69)-C(70)  | 1.378(6) | C(87)-C(92)      | 1.379(5)   |
| C(69)-H(69)  | 0.9500   | C(87)-C(88)      | 1.395(5)   |
| C(70)-H(70)  | 0.9500   | C(88)-C(89)      | 1.385(5)   |
| C(71)-C(72)  | 1.390(4) | C(88)-H(88)      | 0.9500     |
| C(71)-C(76)  | 1.395(4) | C(89)-C(90)      | 1.379(6)   |
| C(72)-C(73)  | 1.380(4) | C(89)-H(89)      | 0.9500     |
| C(72)-H(72)  | 0.9500   | C(90)-C(91)      | 1.370(5)   |
| C(73)-C(74)  | 1.378(4) | C(90)-H(90)      | 0.9500     |
| C(73)-H(73)  | 0.9500   | C(91)-C(92)      | 1.389(5)   |
| C(74)-C(75)  | 1.391(5) | C(91)-H(91)      | 0.9500     |
| C(74)-H(74)  | 0.9500   | C(92)-H(92)      | 0.9500     |
| C(75)-C(76)  | 1.377(4) | N(1)-Mo(1)-C(37) | 103.98(13) |
| C(75)-H(75)  | 0.9500   | N(1)-Mo(1)-N(3)  | 116.34(11) |
| C(76)-H(76)  | 0.9500   | C(37)-Mo(1)-N(3) | 106.86(12) |
| C(77)-C(82)  | 1.398(4) | N(1)-Mo(1)-N(2)  | 114.03(11) |

|                  |            |                     |          |
|------------------|------------|---------------------|----------|
| C(37)-Mo(1)-N(2) | 104.07(12) | C(7)-C(8)-H(8C)     | 109.5    |
| N(3)-Mo(1)-N(2)  | 110.32(10) | H(8A)-C(8)-H(8C)    | 109.5    |
| C(1)-N(1)-Mo(1)  | 169.0(2)   | H(8B)-C(8)-H(8C)    | 109.5    |
| C(13)-N(2)-C(19) | 115.2(2)   | C(7)-C(9)-H(9A)     | 109.5    |
| C(13)-N(2)-Mo(1) | 118.61(19) | C(7)-C(9)-H(9B)     | 109.5    |
| C(19)-N(2)-Mo(1) | 125.61(19) | H(9A)-C(9)-H(9B)    | 109.5    |
| C(31)-N(3)-C(25) | 117.6(3)   | C(7)-C(9)-H(9C)     | 109.5    |
| C(31)-N(3)-Mo(1) | 132.3(2)   | H(9A)-C(9)-H(9C)    | 109.5    |
| C(25)-N(3)-Mo(1) | 110.1(2)   | H(9B)-C(9)-H(9C)    | 109.5    |
| N(1)-C(1)-C(2)   | 118.6(3)   | C(2)-C(10)-C(11)    | 112.5(3) |
| N(1)-C(1)-C(6)   | 120.1(3)   | C(2)-C(10)-C(12)    | 110.1(3) |
| C(2)-C(1)-C(6)   | 121.2(3)   | C(11)-C(10)-C(12)   | 109.9(3) |
| C(3)-C(2)-C(1)   | 117.8(3)   | C(2)-C(10)-H(10)    | 108.1    |
| C(3)-C(2)-C(10)  | 119.0(3)   | C(11)-C(10)-H(10)   | 108.1    |
| C(1)-C(2)-C(10)  | 123.2(3)   | C(12)-C(10)-H(10)   | 108.1    |
| C(2)-C(3)-C(4)   | 121.9(3)   | C(10)-C(11)-H(11A)  | 109.5    |
| C(2)-C(3)-H(3)   | 119.0      | C(10)-C(11)-H(11B)  | 109.5    |
| C(4)-C(3)-H(3)   | 119.0      | H(11A)-C(11)-H(11B) | 109.5    |
| C(5)-C(4)-C(3)   | 119.3(3)   | C(10)-C(11)-H(11C)  | 109.5    |
| C(5)-C(4)-H(4)   | 120.3      | H(11A)-C(11)-H(11C) | 109.5    |
| C(3)-C(4)-H(4)   | 120.3      | H(11B)-C(11)-H(11C) | 109.5    |
| C(4)-C(5)-C(6)   | 121.7(3)   | C(10)-C(12)-H(12A)  | 109.5    |
| C(4)-C(5)-H(5)   | 119.1      | C(10)-C(12)-H(12B)  | 109.5    |
| C(6)-C(5)-H(5)   | 119.1      | H(12A)-C(12)-H(12B) | 109.5    |
| C(5)-C(6)-C(1)   | 117.9(3)   | C(10)-C(12)-H(12C)  | 109.5    |
| C(5)-C(6)-C(7)   | 119.7(3)   | H(12A)-C(12)-H(12C) | 109.5    |
| C(1)-C(6)-C(7)   | 122.3(3)   | H(12B)-C(12)-H(12C) | 109.5    |
| C(6)-C(7)-C(9)   | 111.8(3)   | C(14)-C(13)-C(18)   | 117.7(3) |
| C(6)-C(7)-C(8)   | 110.3(3)   | C(14)-C(13)-N(2)    | 123.3(3) |
| C(9)-C(7)-C(8)   | 110.7(3)   | C(18)-C(13)-N(2)    | 119.0(3) |
| C(6)-C(7)-H(7)   | 107.9      | C(15)-C(14)-C(13)   | 120.4(3) |
| C(9)-C(7)-H(7)   | 107.9      | C(15)-C(14)-H(14)   | 119.8    |
| C(8)-C(7)-H(7)   | 107.9      | C(13)-C(14)-H(14)   | 119.8    |
| C(7)-C(8)-H(8A)  | 109.5      | C(16)-C(15)-C(14)   | 121.3(3) |
| C(7)-C(8)-H(8B)  | 109.5      | C(16)-C(15)-H(15)   | 119.3    |
| H(8A)-C(8)-H(8B) | 109.5      | C(14)-C(15)-H(15)   | 119.3    |

|                   |          |                   |          |
|-------------------|----------|-------------------|----------|
| C(17)-C(16)-C(15) | 118.7(3) | C(29)-C(28)-C(27) | 119.6(4) |
| C(17)-C(16)-H(16) | 120.7    | C(29)-C(28)-H(28) | 120.2    |
| C(15)-C(16)-H(16) | 120.7    | C(27)-C(28)-H(28) | 120.2    |
| C(16)-C(17)-C(18) | 121.1(3) | C(28)-C(29)-C(30) | 120.6(4) |
| C(16)-C(17)-H(17) | 119.5    | C(28)-C(29)-H(29) | 119.7    |
| C(18)-C(17)-H(17) | 119.5    | C(30)-C(29)-H(29) | 119.7    |
| C(17)-C(18)-C(13) | 120.8(3) | C(29)-C(30)-C(25) | 120.3(4) |
| C(17)-C(18)-H(18) | 119.6    | C(29)-C(30)-H(30) | 119.9    |
| C(13)-C(18)-H(18) | 119.6    | C(25)-C(30)-H(30) | 119.9    |
| C(24)-C(19)-C(20) | 118.8(3) | C(36)-C(31)-C(32) | 117.9(3) |
| C(24)-C(19)-N(2)  | 121.1(3) | C(36)-C(31)-N(3)  | 120.2(3) |
| C(20)-C(19)-N(2)  | 120.1(3) | C(32)-C(31)-N(3)  | 122.0(3) |
| C(21)-C(20)-C(19) | 120.1(3) | C(33)-C(32)-C(31) | 120.5(3) |
| C(21)-C(20)-H(20) | 120.0    | C(33)-C(32)-H(32) | 119.8    |
| C(19)-C(20)-H(20) | 120.0    | C(31)-C(32)-H(32) | 119.8    |
| C(22)-C(21)-C(20) | 121.1(3) | C(32)-C(33)-C(34) | 121.5(3) |
| C(22)-C(21)-H(21) | 119.5    | C(32)-C(33)-H(33) | 119.2    |
| C(20)-C(21)-H(21) | 119.5    | C(34)-C(33)-H(33) | 119.2    |
| C(21)-C(22)-C(23) | 119.2(3) | C(33)-C(34)-C(35) | 118.6(3) |
| C(21)-C(22)-H(22) | 120.4    | C(33)-C(34)-H(34) | 120.7    |
| C(23)-C(22)-H(22) | 120.4    | C(35)-C(34)-H(34) | 120.7    |
| C(22)-C(23)-C(24) | 120.4(3) | C(34)-C(35)-C(36) | 120.8(3) |
| C(22)-C(23)-H(23) | 119.8    | C(34)-C(35)-H(35) | 119.6    |
| C(24)-C(23)-H(23) | 119.8    | C(36)-C(35)-H(35) | 119.6    |
| C(19)-C(24)-C(23) | 120.5(3) | C(35)-C(36)-C(31) | 120.7(3) |
| C(19)-C(24)-H(24) | 119.7    | C(35)-C(36)-H(36) | 119.6    |
| C(23)-C(24)-H(24) | 119.7    | C(31)-C(36)-H(36) | 119.6    |
| C(26)-C(25)-C(30) | 118.9(3) | C(38)-C(37)-Mo(1) | 146.2(3) |
| C(26)-C(25)-N(3)  | 119.7(3) | C(38)-C(37)-H(37) | 106.9    |
| C(30)-C(25)-N(3)  | 121.3(3) | Mo(1)-C(37)-H(37) | 106.9    |
| C(25)-C(26)-C(27) | 120.2(3) | C(37)-C(38)-C(40) | 110.5(3) |
| C(25)-C(26)-H(26) | 119.9    | C(37)-C(38)-C(41) | 107.0(3) |
| C(27)-C(26)-H(26) | 119.9    | C(40)-C(38)-C(41) | 112.2(3) |
| C(28)-C(27)-C(26) | 120.3(4) | C(37)-C(38)-C(39) | 108.8(3) |
| C(28)-C(27)-H(27) | 119.9    | C(40)-C(38)-C(39) | 107.8(3) |
| C(26)-C(27)-H(27) | 119.9    | C(41)-C(38)-C(39) | 110.5(3) |

|                     |            |                     |            |
|---------------------|------------|---------------------|------------|
| C(38)-C(39)-H(39A)  | 109.5      | C(47)-N(4)-Mo(2)    | 170.8(2)   |
| C(38)-C(39)-H(39B)  | 109.5      | C(59)-N(5)-C(65)    | 116.8(3)   |
| H(39A)-C(39)-H(39B) | 109.5      | C(59)-N(5)-Mo(2)    | 131.2(2)   |
| C(38)-C(39)-H(39C)  | 109.5      | C(65)-N(5)-Mo(2)    | 112.0(2)   |
| H(39A)-C(39)-H(39C) | 109.5      | C(77)-N(6)-C(71)    | 116.0(2)   |
| H(39B)-C(39)-H(39C) | 109.5      | C(77)-N(6)-Mo(2)    | 118.26(19) |
| C(38)-C(40)-H(40A)  | 109.5      | C(71)-N(6)-Mo(2)    | 124.9(2)   |
| C(38)-C(40)-H(40B)  | 109.5      | N(4)-C(47)-C(52)    | 119.7(3)   |
| H(40A)-C(40)-H(40B) | 109.5      | N(4)-C(47)-C(48)    | 119.5(3)   |
| C(38)-C(40)-H(40C)  | 109.5      | C(52)-C(47)-C(48)   | 120.7(3)   |
| H(40A)-C(40)-H(40C) | 109.5      | C(49)-C(48)-C(47)   | 117.6(3)   |
| H(40B)-C(40)-H(40C) | 109.5      | C(49)-C(48)-C(56)   | 119.7(3)   |
| C(46)-C(41)-C(42)   | 116.9(4)   | C(47)-C(48)-C(56)   | 122.8(3)   |
| C(46)-C(41)-C(38)   | 121.3(3)   | C(50)-C(49)-C(48)   | 122.0(3)   |
| C(42)-C(41)-C(38)   | 121.8(3)   | C(50)-C(49)-H(49)   | 119.0      |
| C(41)-C(42)-C(43)   | 120.0(4)   | C(48)-C(49)-H(49)   | 119.0      |
| C(41)-C(42)-H(42)   | 120.0      | C(49)-C(50)-C(51)   | 119.8(3)   |
| C(43)-C(42)-H(42)   | 120.0      | C(49)-C(50)-H(50)   | 120.1      |
| C(44)-C(43)-C(42)   | 121.0(5)   | C(51)-C(50)-H(50)   | 120.1      |
| C(44)-C(43)-H(43)   | 119.5      | C(50)-C(51)-C(52)   | 121.3(3)   |
| C(42)-C(43)-H(43)   | 119.5      | C(50)-C(51)-H(51)   | 119.4      |
| C(45)-C(44)-C(43)   | 119.2(4)   | C(52)-C(51)-H(51)   | 119.4      |
| C(45)-C(44)-H(44)   | 120.4      | C(51)-C(52)-C(47)   | 118.6(3)   |
| C(43)-C(44)-H(44)   | 120.4      | C(51)-C(52)-C(53)   | 118.9(3)   |
| C(44)-C(45)-C(46)   | 120.8(4)   | C(47)-C(52)-C(53)   | 122.4(3)   |
| C(44)-C(45)-H(45)   | 119.6      | C(52)-C(53)-C(54)   | 112.6(3)   |
| C(46)-C(45)-H(45)   | 119.6      | C(52)-C(53)-C(55)   | 110.4(3)   |
| C(41)-C(46)-C(45)   | 122.1(4)   | C(54)-C(53)-C(55)   | 110.6(3)   |
| C(41)-C(46)-H(46)   | 118.9      | C(52)-C(53)-H(53)   | 107.7      |
| C(45)-C(46)-H(46)   | 118.9      | C(54)-C(53)-H(53)   | 107.7      |
| N(4)-Mo(2)-C(83)    | 103.76(13) | C(55)-C(53)-H(53)   | 107.7      |
| N(4)-Mo(2)-N(6)     | 113.85(11) | C(53)-C(54)-H(54A)  | 109.5      |
| C(83)-Mo(2)-N(6)    | 102.71(12) | C(53)-C(54)-H(54B)  | 109.5      |
| N(4)-Mo(2)-N(5)     | 116.87(11) | H(54A)-C(54)-H(54B) | 109.5      |
| C(83)-Mo(2)-N(5)    | 106.42(12) | C(53)-C(54)-H(54C)  | 109.5      |
| N(6)-Mo(2)-N(5)     | 111.55(11) | H(54A)-C(54)-H(54C) | 109.5      |

|                     |          |                   |          |
|---------------------|----------|-------------------|----------|
| H(54B)-C(54)-H(54C) | 109.5    | C(61)-C(62)-H(62) | 120.7    |
| C(53)-C(55)-H(55A)  | 109.5    | C(62)-C(63)-C(64) | 121.6(3) |
| C(53)-C(55)-H(55B)  | 109.5    | C(62)-C(63)-H(63) | 119.2    |
| H(55A)-C(55)-H(55B) | 109.5    | C(64)-C(63)-H(63) | 119.2    |
| C(53)-C(55)-H(55C)  | 109.5    | C(63)-C(64)-C(59) | 120.3(3) |
| H(55A)-C(55)-H(55C) | 109.5    | C(63)-C(64)-H(64) | 119.9    |
| H(55B)-C(55)-H(55C) | 109.5    | C(59)-C(64)-H(64) | 119.9    |
| C(48)-C(56)-C(58)   | 111.8(3) | C(70)-C(65)-C(66) | 119.3(4) |
| C(48)-C(56)-C(57)   | 109.9(3) | C(70)-C(65)-N(5)  | 120.8(3) |
| C(58)-C(56)-C(57)   | 110.1(3) | C(66)-C(65)-N(5)  | 119.8(3) |
| C(48)-C(56)-H(56)   | 108.3    | C(65)-C(66)-C(67) | 119.2(4) |
| C(58)-C(56)-H(56)   | 108.3    | C(65)-C(66)-H(66) | 120.4    |
| C(57)-C(56)-H(56)   | 108.3    | C(67)-C(66)-H(66) | 120.4    |
| C(56)-C(57)-H(57A)  | 109.5    | C(68)-C(67)-C(66) | 120.7(5) |
| C(56)-C(57)-H(57B)  | 109.5    | C(68)-C(67)-H(67) | 119.6    |
| H(57A)-C(57)-H(57B) | 109.5    | C(66)-C(67)-H(67) | 119.6    |
| C(56)-C(57)-H(57C)  | 109.5    | C(69)-C(68)-C(67) | 119.9(4) |
| H(57A)-C(57)-H(57C) | 109.5    | C(69)-C(68)-H(68) | 120.1    |
| H(57B)-C(57)-H(57C) | 109.5    | C(67)-C(68)-H(68) | 120.1    |
| C(56)-C(58)-H(58A)  | 109.5    | C(68)-C(69)-C(70) | 120.6(5) |
| C(56)-C(58)-H(58B)  | 109.5    | C(68)-C(69)-H(69) | 119.7    |
| H(58A)-C(58)-H(58B) | 109.5    | C(70)-C(69)-H(69) | 119.7    |
| C(56)-C(58)-H(58C)  | 109.5    | C(65)-C(70)-C(69) | 120.3(5) |
| H(58A)-C(58)-H(58C) | 109.5    | C(65)-C(70)-H(70) | 119.8    |
| H(58B)-C(58)-H(58C) | 109.5    | C(69)-C(70)-H(70) | 119.8    |
| C(60)-C(59)-C(64)   | 118.0(3) | C(72)-C(71)-C(76) | 118.8(3) |
| C(60)-C(59)-N(5)    | 120.0(3) | C(72)-C(71)-N(6)  | 121.0(3) |
| C(64)-C(59)-N(5)    | 122.0(3) | C(76)-C(71)-N(6)  | 120.2(3) |
| C(61)-C(60)-C(59)   | 120.4(3) | C(73)-C(72)-C(71) | 120.7(3) |
| C(61)-C(60)-H(60)   | 119.8    | C(73)-C(72)-H(72) | 119.6    |
| C(59)-C(60)-H(60)   | 119.8    | C(71)-C(72)-H(72) | 119.6    |
| C(60)-C(61)-C(62)   | 121.1(3) | C(74)-C(73)-C(72) | 120.4(3) |
| C(60)-C(61)-H(61)   | 119.4    | C(74)-C(73)-H(73) | 119.8    |
| C(62)-C(61)-H(61)   | 119.4    | C(72)-C(73)-H(73) | 119.8    |
| C(63)-C(62)-C(61)   | 118.5(3) | C(73)-C(74)-C(75) | 119.3(3) |
| C(63)-C(62)-H(62)   | 120.7    | C(73)-C(74)-H(74) | 120.4    |

|                    |          |                     |          |
|--------------------|----------|---------------------|----------|
| C(75)-C(74)-H(74)  | 120.4    | H(85A)-C(85)-H(85B) | 109.5    |
| C(76)-C(75)-C(74)  | 120.7(3) | C(84)-C(85)-H(85C)  | 109.5    |
| C(76)-C(75)-H(75)  | 119.6    | H(85A)-C(85)-H(85C) | 109.5    |
| C(74)-C(75)-H(75)  | 119.6    | H(85B)-C(85)-H(85C) | 109.5    |
| C(75)-C(76)-C(71)  | 120.1(3) | C(84)-C(86)-H(86A)  | 109.5    |
| C(75)-C(76)-H(76)  | 119.9    | C(84)-C(86)-H(86B)  | 109.5    |
| C(71)-C(76)-H(76)  | 119.9    | H(86A)-C(86)-H(86B) | 109.5    |
| C(82)-C(77)-C(78)  | 118.1(3) | C(84)-C(86)-H(86C)  | 109.5    |
| C(82)-C(77)-N(6)   | 122.5(3) | H(86A)-C(86)-H(86C) | 109.5    |
| C(78)-C(77)-N(6)   | 119.4(3) | H(86B)-C(86)-H(86C) | 109.5    |
| C(79)-C(78)-C(77)  | 121.1(3) | C(92)-C(87)-C(88)   | 117.0(3) |
| C(79)-C(78)-H(78)  | 119.5    | C(92)-C(87)-C(84)   | 121.5(3) |
| C(77)-C(78)-H(78)  | 119.5    | C(88)-C(87)-C(84)   | 121.5(3) |
| C(78)-C(79)-C(80)  | 120.4(3) | C(89)-C(88)-C(87)   | 121.6(4) |
| C(78)-C(79)-H(79)  | 119.8    | C(89)-C(88)-H(88)   | 119.2    |
| C(80)-C(79)-H(79)  | 119.8    | C(87)-C(88)-H(88)   | 119.2    |
| C(81)-C(80)-C(79)  | 119.1(3) | C(90)-C(89)-C(88)   | 120.2(4) |
| C(81)-C(80)-H(80)  | 120.4    | C(90)-C(89)-H(89)   | 119.9    |
| C(79)-C(80)-H(80)  | 120.4    | C(88)-C(89)-H(89)   | 119.9    |
| C(80)-C(81)-C(82)  | 121.1(3) | C(91)-C(90)-C(89)   | 118.9(4) |
| C(80)-C(81)-H(81)  | 119.5    | C(91)-C(90)-H(90)   | 120.5    |
| C(82)-C(81)-H(81)  | 119.5    | C(89)-C(90)-H(90)   | 120.5    |
| C(81)-C(82)-C(77)  | 120.2(3) | C(90)-C(91)-C(92)   | 120.7(4) |
| C(81)-C(82)-H(82)  | 119.9    | C(90)-C(91)-H(91)   | 119.6    |
| C(77)-C(82)-H(82)  | 119.9    | C(92)-C(91)-H(91)   | 119.6    |
| C(84)-C(83)-Mo(2)  | 146.1(2) | C(87)-C(92)-C(91)   | 121.5(4) |
| C(84)-C(83)-H(83)  | 107.0    | C(87)-C(92)-H(92)   | 119.3    |
| Mo(2)-C(83)-H(83)  | 107.0    | C(91)-C(92)-H(92)   | 119.3    |
| C(83)-C(84)-C(87)  | 105.5(3) |                     |          |
| C(83)-C(84)-C(86)  | 108.8(3) |                     |          |
| C(87)-C(84)-C(86)  | 111.5(3) |                     |          |
| C(83)-C(84)-C(85)  | 110.4(3) |                     |          |
| C(87)-C(84)-C(85)  | 112.5(3) |                     |          |
| C(86)-C(84)-C(85)  | 108.1(3) |                     |          |
| C(84)-C(85)-H(85A) | 109.5    |                     |          |
| C(84)-C(85)-H(85B) | 109.5    |                     |          |

Table 4. Anisotropic displacement parameters ( $\text{\AA}^2 \times 10^3$ ) for  $\text{Mo}(\text{NAr})(\text{CHCMe}_2\text{Ph})(\text{NPh}_2)_2$ . The anisotropic displacement factor exponent takes the form:  $-2\pi^2 [ h^2 a^{*2} U^{11} + \dots + 2 h k a^* b^* U^{12} ]$

|       | U11   | U22   | U33   | U23    | U13   | U12   |
|-------|-------|-------|-------|--------|-------|-------|
| Mo(1) | 13(1) | 14(1) | 13(1) | -2(1)  | 1(1)  | -1(1) |
| N(1)  | 17(1) | 17(1) | 15(1) | -2(1)  | -1(1) | -2(1) |
| N(2)  | 13(1) | 15(1) | 14(1) | 1(1)   | 2(1)  | -1(1) |
| N(3)  | 16(1) | 17(1) | 17(1) | -4(1)  | 1(1)  | 0(1)  |
| C(1)  | 15(2) | 13(2) | 14(2) | 0(1)   | 4(1)  | -2(1) |
| C(2)  | 17(2) | 17(2) | 14(2) | -3(1)  | 4(1)  | 0(1)  |
| C(3)  | 23(2) | 25(2) | 16(2) | 1(1)   | -1(1) | 3(2)  |
| C(4)  | 24(2) | 15(2) | 24(2) | 0(1)   | 4(1)  | 3(1)  |
| C(5)  | 20(2) | 17(2) | 17(2) | -6(1)  | 5(1)  | -2(1) |
| C(6)  | 14(2) | 15(2) | 17(2) | -5(1)  | 5(1)  | -4(1) |
| C(7)  | 19(2) | 17(2) | 14(2) | -5(1)  | 2(1)  | 0(1)  |
| C(8)  | 20(2) | 36(2) | 19(2) | -6(2)  | 3(1)  | -4(2) |
| C(9)  | 23(2) | 26(2) | 24(2) | -10(2) | 1(2)  | -3(2) |
| C(10) | 27(2) | 24(2) | 17(2) | -4(1)  | -7(1) | 6(2)  |
| C(11) | 32(2) | 36(2) | 42(2) | -18(2) | -9(2) | 0(2)  |
| C(12) | 42(2) | 33(2) | 18(2) | -7(2)  | -1(2) | 12(2) |
| C(13) | 9(1)  | 16(2) | 20(2) | -3(1)  | 1(1)  | 0(1)  |
| C(14) | 15(2) | 22(2) | 17(2) | -4(1)  | 0(1)  | 0(1)  |
| C(15) | 17(2) | 23(2) | 30(2) | -8(2)  | 0(2)  | -4(1) |
| C(16) | 14(2) | 24(2) | 35(2) | -3(2)  | 3(2)  | -6(1) |
| C(17) | 12(2) | 26(2) | 26(2) | 3(2)   | 5(1)  | -2(1) |
| C(18) | 12(2) | 26(2) | 18(2) | -4(1)  | 0(1)  | 0(1)  |
| C(19) | 16(2) | 16(2) | 17(2) | -2(1)  | -1(1) | -5(1) |
| C(20) | 15(2) | 35(2) | 30(2) | 9(2)   | 5(1)  | 0(2)  |
| C(21) | 17(2) | 37(2) | 30(2) | 10(2)  | -5(2) | -1(2) |
| C(22) | 31(2) | 25(2) | 12(2) | 4(1)   | -3(1) | -7(2) |
| C(23) | 28(2) | 22(2) | 20(2) | -3(1)  | 8(2)  | -1(2) |
| C(24) | 18(2) | 23(2) | 18(2) | -5(1)  | 1(1)  | 3(1)  |
| C(25) | 16(2) | 17(2) | 23(2) | -5(1)  | 5(1)  | 1(1)  |



|       |        |       |       |        |        |        |
|-------|--------|-------|-------|--------|--------|--------|
| C(26) | 24(2)  | 24(2) | 39(2) | -6(2)  | -11(2) | 2(2)   |
| C(27) | 54(3)  | 28(2) | 56(3) | -2(2)  | -36(2) | 7(2)   |
| C(28) | 52(3)  | 19(2) | 71(3) | 5(2)   | -25(2) | 3(2)   |
| C(29) | 48(3)  | 19(2) | 59(3) | -8(2)  | -18(2) | -5(2)  |
| C(30) | 33(2)  | 23(2) | 37(2) | -4(2)  | -13(2) | -2(2)  |
| C(31) | 15(2)  | 23(2) | 14(2) | -7(1)  | -1(1)  | -6(1)  |
| C(32) | 22(2)  | 30(2) | 24(2) | -9(2)  | 1(1)   | -2(2)  |
| C(33) | 22(2)  | 50(3) | 22(2) | -15(2) | 4(2)   | -2(2)  |
| C(34) | 25(2)  | 48(2) | 19(2) | -10(2) | 5(2)   | -16(2) |
| C(35) | 25(2)  | 30(2) | 19(2) | -4(2)  | -1(1)  | -12(2) |
| C(36) | 21(2)  | 23(2) | 17(2) | -8(1)  | 1(1)   | -7(1)  |
| C(37) | 17(2)  | 19(2) | 21(2) | -3(1)  | -1(1)  | -4(1)  |
| C(38) | 20(2)  | 26(2) | 33(2) | -11(2) | 9(2)   | -8(2)  |
| C(39) | 52(3)  | 77(3) | 32(2) | -26(2) | 24(2)  | -41(3) |
| C(40) | 27(2)  | 25(2) | 88(4) | -19(2) | 11(2)  | -3(2)  |
| C(41) | 15(2)  | 22(2) | 30(2) | -7(2)  | 3(1)   | -5(1)  |
| C(42) | 77(4)  | 29(2) | 39(2) | -1(2)  | -9(2)  | 0(2)   |
| C(43) | 112(5) | 23(2) | 77(4) | -12(3) | 22(4)  | -16(3) |
| C(44) | 62(3)  | 74(4) | 64(3) | -48(3) | 31(3)  | -39(3) |
| C(45) | 34(2)  | 81(4) | 27(2) | -27(2) | 2(2)   | -9(2)  |
| C(46) | 36(2)  | 39(2) | 23(2) | -4(2)  | 5(2)   | -2(2)  |
| Mo(2) | 12(1)  | 13(1) | 14(1) | -3(1)  | 3(1)   | -3(1)  |
| N(4)  | 15(1)  | 13(1) | 14(1) | -4(1)  | 2(1)   | -4(1)  |
| N(5)  | 19(1)  | 16(1) | 16(1) | -3(1)  | 1(1)   | -5(1)  |
| N(6)  | 14(1)  | 20(1) | 14(1) | -4(1)  | 2(1)   | -1(1)  |
| C(47) | 13(2)  | 15(2) | 16(2) | -2(1)  | 0(1)   | -4(1)  |
| C(48) | 17(2)  | 20(2) | 16(2) | -3(1)  | 2(1)   | -2(1)  |
| C(49) | 21(2)  | 23(2) | 15(2) | -2(1)  | 4(1)   | -9(1)  |
| C(50) | 23(2)  | 17(2) | 20(2) | 0(1)   | 1(1)   | -8(1)  |
| C(51) | 23(2)  | 16(2) | 22(2) | -5(1)  | -1(1)  | -2(1)  |
| C(52) | 14(2)  | 17(2) | 14(2) | -1(1)  | -2(1)  | -1(1)  |
| C(53) | 16(2)  | 15(2) | 17(2) | -6(1)  | 3(1)   | -3(1)  |
| C(54) | 17(2)  | 23(2) | 27(2) | -8(2)  | 3(1)   | -1(1)  |
| C(55) | 21(2)  | 32(2) | 17(2) | -3(2)  | 0(1)   | -5(2)  |
| C(56) | 25(2)  | 23(2) | 20(2) | -10(1) | 9(1)   | -9(2)  |
| C(57) | 42(2)  | 36(2) | 22(2) | -8(2)  | 6(2)   | -22(2) |

|       |       |       |        |        |        |        |
|-------|-------|-------|--------|--------|--------|--------|
| C(58) | 34(2) | 34(2) | 36(2)  | -16(2) | 17(2)  | -7(2)  |
| C(59) | 11(2) | 22(2) | 19(2)  | -6(1)  | 5(1)   | -4(1)  |
| C(60) | 17(2) | 19(2) | 16(2)  | -7(1)  | 2(1)   | 0(1)   |
| C(61) | 18(2) | 22(2) | 24(2)  | -6(2)  | 5(1)   | 4(1)   |
| C(62) | 17(2) | 39(2) | 19(2)  | -3(2)  | -5(1)  | 2(2)   |
| C(63) | 25(2) | 34(2) | 26(2)  | -11(2) | -3(2)  | -11(2) |
| C(64) | 22(2) | 27(2) | 22(2)  | -4(1)  | 0(1)   | -9(2)  |
| C(65) | 25(2) | 19(2) | 26(2)  | -2(2)  | -5(2)  | -9(2)  |
| C(66) | 38(2) | 41(2) | 27(2)  | 5(2)   | -5(2)  | -21(2) |
| C(67) | 76(4) | 49(3) | 55(3)  | 26(2)  | -27(3) | -44(3) |
| C(68) | 88(4) | 24(2) | 86(4)  | 25(3)  | -62(3) | -25(3) |
| C(69) | 55(3) | 20(2) | 120(5) | -15(3) | -34(3) | -2(2)  |
| C(70) | 32(2) | 26(2) | 66(3)  | -16(2) | -2(2)  | -5(2)  |
| C(71) | 14(2) | 17(2) | 16(2)  | -3(1)  | 3(1)   | 1(1)   |
| C(72) | 20(2) | 19(2) | 22(2)  | -5(1)  | 4(1)   | -6(1)  |
| C(73) | 24(2) | 24(2) | 18(2)  | -8(1)  | -4(1)  | -5(1)  |
| C(74) | 25(2) | 24(2) | 16(2)  | -1(1)  | -3(1)  | 2(2)   |
| C(75) | 28(2) | 29(2) | 25(2)  | 6(2)   | 2(2)   | -10(2) |
| C(76) | 19(2) | 26(2) | 24(2)  | 2(2)   | -2(1)  | -9(1)  |
| C(77) | 13(2) | 19(2) | 18(2)  | -3(1)  | 2(1)   | -8(1)  |
| C(78) | 15(2) | 25(2) | 18(2)  | -5(1)  | 3(1)   | -4(1)  |
| C(79) | 21(2) | 32(2) | 13(2)  | 2(2)   | -3(1)  | -5(2)  |
| C(80) | 14(2) | 20(2) | 32(2)  | 1(2)   | 0(2)   | -2(1)  |
| C(81) | 17(2) | 22(2) | 24(2)  | -6(1)  | 7(1)   | -2(1)  |
| C(82) | 17(2) | 21(2) | 16(2)  | -2(1)  | 0(1)   | -4(1)  |
| C(83) | 21(2) | 13(2) | 12(2)  | -3(1)  | 2(1)   | -2(1)  |
| C(84) | 15(2) | 22(2) | 30(2)  | -10(2) | -2(1)  | 1(1)   |
| C(85) | 17(2) | 29(2) | 53(3)  | -23(2) | 1(2)   | -6(2)  |
| C(86) | 30(2) | 39(2) | 30(2)  | -10(2) | -9(2)  | 9(2)   |
| C(87) | 14(2) | 26(2) | 26(2)  | -8(2)  | -2(1)  | -2(1)  |
| C(88) | 41(2) | 28(2) | 46(3)  | -6(2)  | 21(2)  | -2(2)  |
| C(89) | 51(3) | 24(2) | 56(3)  | -12(2) | 23(2)  | -1(2)  |
| C(90) | 29(2) | 37(2) | 42(2)  | -21(2) | 3(2)   | 4(2)   |
| C(91) | 26(2) | 48(3) | 27(2)  | -12(2) | -3(2)  | 3(2)   |
| C(92) | 36(2) | 29(2) | 24(2)  | -4(2)  | -5(2)  | 3(2)   |

---

**Table 5.** Hydrogen coordinates ( $\times 10^4$ ) and isotropic displacement parameters ( $\text{\AA}^2 \times 10^3$ ) for  $\text{Mo}(\text{NAr})(\text{CHCMe}_2\text{Ph})(\text{NPh}_2)_2$ .

|        | x     | y     | z     | U(eq) |
|--------|-------|-------|-------|-------|
| H(3)   | 10373 | 5258  | 2900  | 27    |
| H(4)   | 10298 | 4444  | 2230  | 26    |
| H(5)   | 8902  | 4700  | 1270  | 21    |
| H(7)   | 6809  | 6299  | 647   | 20    |
| H(8A)  | 9116  | 6157  | 157   | 38    |
| H(8B)  | 7889  | 5965  | -297  | 38    |
| H(8C)  | 8939  | 5378  | 149   | 38    |
| H(9A)  | 6690  | 4870  | 734   | 35    |
| H(9B)  | 5779  | 5431  | 200   | 35    |
| H(9C)  | 5453  | 5394  | 962   | 35    |
| H(10)  | 8357  | 6909  | 2659  | 28    |
| H(11A) | 11196 | 6301  | 3113  | 53    |
| H(11B) | 10486 | 7038  | 3207  | 53    |
| H(11C) | 10890 | 6895  | 2490  | 53    |
| H(12A) | 7524  | 6013  | 3444  | 48    |
| H(12B) | 8346  | 6519  | 3788  | 48    |
| H(12C) | 9159  | 5795  | 3709  | 48    |
| H(14)  | 3618  | 6779  | -290  | 22    |
| H(15)  | 2108  | 5925  | -53   | 27    |
| H(16)  | 1550  | 5499  | 1025  | 29    |
| H(17)  | 2470  | 5959  | 1872  | 27    |
| H(18)  | 3894  | 6847  | 1649  | 22    |
| H(20)  | 2951  | 8241  | -197  | 35    |
| H(21)  | 3089  | 8765  | -1281 | 36    |
| H(22)  | 5164  | 8566  | -1878 | 28    |
| H(23)  | 7182  | 7885  | -1360 | 28    |
| H(24)  | 7069  | 7355  | -269  | 24    |
| H(26)  | 3115  | 8536  | 1049  | 35    |
| H(27)  | 2685  | 9673  | 547   | 57    |
| H(28)  | 3923  | 10487 | 911   | 59    |

|        |       |       |      |    |
|--------|-------|-------|------|----|
| H(29)  | 5543  | 10166 | 1794 | 50 |
| H(30)  | 6045  | 9032  | 2275 | 37 |
| H(32)  | 3243  | 8549  | 2723 | 30 |
| H(33)  | 2484  | 8104  | 3755 | 36 |
| H(34)  | 3292  | 6997  | 4254 | 35 |
| H(35)  | 4870  | 6322  | 3691 | 29 |
| H(36)  | 5635  | 6752  | 2648 | 23 |
| H(37)  | 6849  | 8543  | 718  | 22 |
| H(39A) | 8949  | 8162  | -226 | 74 |
| H(39B) | 10113 | 8648  | -78  | 74 |
| H(39C) | 8421  | 8920  | -125 | 74 |
| H(40A) | 9857  | 7408  | 1399 | 68 |
| H(40B) | 11025 | 7714  | 897  | 68 |
| H(40C) | 9824  | 7298  | 654  | 68 |
| H(42)  | 8797  | 9639  | 448  | 59 |
| H(43)  | 9365  | 10450 | 1072 | 84 |
| H(44)  | 10216 | 10121 | 2134 | 71 |
| H(45)  | 10518 | 8993  | 2589 | 54 |
| H(46)  | 9961  | 8183  | 1996 | 40 |
| H(49)  | 5527  | 4707  | 2077 | 24 |
| H(50)  | 5044  | 5526  | 2726 | 24 |
| H(51)  | 3777  | 5287  | 3692 | 24 |
| H(53)  | 2457  | 3705  | 4339 | 19 |
| H(54A) | 1641  | 5130  | 4224 | 33 |
| H(54B) | 1025  | 4579  | 4775 | 33 |
| H(54C) | 660   | 4595  | 4018 | 33 |
| H(55A) | 4688  | 3858  | 4815 | 35 |
| H(55B) | 3366  | 4052  | 5267 | 35 |
| H(55C) | 4120  | 4637  | 4814 | 35 |
| H(56)  | 4305  | 3049  | 2347 | 26 |
| H(57A) | 3040  | 3914  | 1546 | 47 |
| H(57B) | 4162  | 3422  | 1211 | 47 |
| H(57C) | 4557  | 4156  | 1292 | 47 |
| H(58A) | 6865  | 3654  | 1913 | 50 |
| H(58B) | 6519  | 2924  | 1795 | 50 |
| H(58C) | 6821  | 3048  | 2522 | 50 |

|        |       |      |      |    |
|--------|-------|------|------|----|
| H(60)  | 1475  | 3202 | 2369 | 20 |
| H(61)  | 467   | 3620 | 1330 | 26 |
| H(62)  | -694  | 2923 | 758  | 30 |
| H(63)  | -845  | 1801 | 1245 | 33 |
| H(64)  | 141   | 1365 | 2281 | 28 |
| H(66)  | -132  | 1350 | 3901 | 43 |
| H(67)  | -7    | 190  | 4329 | 74 |
| H(68)  | 1828  | -562 | 4030 | 82 |
| H(69)  | 3443  | -185 | 3245 | 78 |
| H(70)  | 3332  | 959  | 2796 | 48 |
| H(72)  | 3151  | 2707 | 5272 | 24 |
| H(73)  | 3532  | 2217 | 6367 | 25 |
| H(74)  | 1963  | 1479 | 6889 | 27 |
| H(75)  | 52    | 1199 | 6290 | 34 |
| H(76)  | -362  | 1697 | 5199 | 28 |
| H(78)  | -201  | 3118 | 3343 | 22 |
| H(79)  | -2039 | 4008 | 3105 | 27 |
| H(80)  | -3152 | 4501 | 3949 | 27 |
| H(81)  | -2391 | 4092 | 5028 | 25 |
| H(82)  | -486  | 3224 | 5276 | 21 |
| H(83)  | 3577  | 1463 | 4337 | 18 |
| H(85A) | 6054  | 2596 | 3623 | 46 |
| H(85B) | 7338  | 2321 | 4150 | 46 |
| H(85C) | 5897  | 2744 | 4354 | 46 |
| H(86A) | 5474  | 1888 | 5262 | 50 |
| H(86B) | 6862  | 1383 | 5135 | 50 |
| H(86C) | 5289  | 1126 | 5186 | 50 |
| H(88)  | 6055  | 382  | 4642 | 46 |
| H(89)  | 6885  | -461 | 4056 | 52 |
| H(90)  | 7550  | -175 | 2965 | 42 |
| H(91)  | 7405  | 962  | 2480 | 40 |
| H(92)  | 6512  | 1805 | 3055 | 36 |

---
